# Supplementary material for: Determination of Heavy Metal Sources in an Agricultural Catchment (Poland) Using the Fingerprinting Method
Source: MDPI journal article supplement (doi:10.3390/w16091209), 2024-04-24
Supplement: s1 [file s1]

## Determination of Heavy Metal Sources in an Agricultural Catchment (Poland) Using the Fingerprinting Method

Table S1. Summary statistics of the analysis

| Element             | Ag    | Al     | As    | B      | Ba     | Be    | Bi    | Ca     | Cd    | Co    | Cr    | Cs    | Cu    | Fe     | Hg    | K      |
|---------------------|-------|--------|-------|--------|--------|-------|-------|--------|-------|-------|-------|-------|-------|--------|-------|--------|
| Count               | 36    | 36     | 36    | 36     | 36     | 36    | 36    | 36     | 36    | 36    | 36    | 36    | 36    | 36     | 36    | 36     |
| Average             | 1.35  | 24 578 | 11.74 | 37.84  | 204.68 | 0.97  | 0.21  | 18 999 | 0.28  | 9.49  | 41.58 | 2.31  | 23.80 | 34 067 | 1.48  | 6 174  |
| Standard deviation  | 2.23  | 9 303  | 7.93  | 33.95  | 72.53  | 0.56  | 0.21  | 12 501 | 0.22  | 2.42  | 11.61 | 1.39  | 15.00 | 14 299 | 1.78  | 3 298  |
| Coeff. of variation | 1.66  | 0.38   | 0.68  | 0.90   | 0.35   | 0.57  | 1.02  | 0.66   | 0.76  | 0.26  | 0.28  | 0.60  | 0.63  | 0.42   | 1.20  | 0.53   |
| Minimum             | 0.10  | 8 380  | 1.55  | 3.69   | 64.08  | 0.07  | 0.05  | 5 505  | 0.06  | 4.18  | 16.07 | 0.13  | 5.93  | 9 203  | 0.04  | 1 260  |
| Maximum             | 11.84 | 47 043 | 35.61 | 129.68 | 348.21 | 2.24  | 1.14  | 51 133 | 0.96  | 13.60 | 68.73 | 5.48  | 69.80 | 64 314 | 8.88  | 13 547 |
| Range               | 11.74 | 38 663 | 34.06 | 125.99 | 284.13 | 2.17  | 1.09  | 45 628 | 0.90  | 9.42  | 52.66 | 5.35  | 63.87 | 55 111 | 8.84  | 12 287 |
| Std. skewness       | 8.59  | 1.24   | 3.11  | 2.70   | -0.58  | 0.73  | 8.26  | 2.82   | 2.59  | -1.33 | 0.23  | 0.98  | 3.29  | 0.72   | 6.23  | 1.52   |
| Std. kurtosis       | 17.54 | 0.00   | 2.75  | 0.55   | -0.29  | -0.35 | 15.64 | 0.57   | 1.35  | -0.63 | -0.14 | -0.13 | 2.21  | 0.08   | 10.26 | -0.33  |
| Element             | Li    | Mg     | Mn    | Mo     | Na     | Ni    | P     | Pb     | S     | Sb    | Se    | Sr    | V     | W      | Zn    |        |
| Count               | 36    | 36     | 36    | 36     | 36     | 36    | 36    | 36     | 36    | 36    | 36    | 36    | 36    | 36     | 36    |        |
| Average             | 21.25 | 5 815  | 1 195 | 0.68   | 573    | 17.10 | 1 829 | 25.84  | 1 075 | 0.82  | 3.13  | 47.46 | 51.49 | 0.21   | 137   |        |
| Standard deviation  | 9.54  | 3 058  | 749   | 0.46   | 320    | 6.33  | 1 152 | 12.37  | 644   | 1.61  | 0.96  | 16.25 | 15.06 | 0.15   | 86.87 |        |
| Coeff. of variation | 0.45  | 0.53   | 0.63  | 0.68   | 0.56   | 0.37  | 0.63  | 0.48   | 0.60  | 1.97  | 0.31  | 0.34  | 0.29  | 0.72   | 0.64  |        |
| Minimum             | 6.09  | 1 369  | 203   | 0.06   | 81.61  | 2.51  | 327   | 5.84   | 178   | 0.03  | 0.97  | 24.03 | 24.01 | 0.03   | 44.52 |        |
| Maximum             | 46.46 | 14 424 | 3 020 | 1.83   | 1 199  | 27.76 | 5 255 | 58.19  | 3 004 | 7.67  | 4.79  | 93.18 | 88.98 | 0.63   | 367   |        |
| Range               | 40.37 | 13 055 | 2 817 | 1.77   | 1 117  | 25.25 | 4 927 | 52.35  | 2 826 | 7.64  | 3.82  | 69.15 | 64.97 | 0.60   | 323   |        |
| Std. skewness       | 2.09  | 1.42   | 1.71  | 2.51   | 0.86   | -1.09 | 3.41  | 2.31   | 2.58  | 9.29  | -2.66 | 1.90  | 0.11  | 2.68   | 2.95  |        |
| Std. kurtosis       | 1.09  | 0.23   | -0.55 | 0.99   | -1.14  | -0.20 | 1.85  | 0.31   | 1.29  | 17.17 | 0.65  | 0.66  | -0.35 | 1.11   | 0.49  |        |

Table S2. Correlation between individual elements (Spearman rank correlation coefficient). Values in bold represent statistically significant (p=0.05) correlation

|    |       |       |       |       |       |       |       |       |       |       |       |       |       |       |       |       |       |       |       |       |       |       |       |       |       |       |       |      |      |      |    |
|----|-------|-------|-------|-------|-------|-------|-------|-------|-------|-------|-------|-------|-------|-------|-------|-------|-------|-------|-------|-------|-------|-------|-------|-------|-------|-------|-------|------|------|------|----|
| Al | 0.11  |       |       |       |       |       |       |       |       |       |       |       |       |       |       |       |       |       |       |       |       |       |       |       |       |       |       |      |      |      |    |
| As | 0.48  | -0.20 |       |       |       |       |       |       |       |       |       |       |       |       |       |       |       |       |       |       |       |       |       |       |       |       |       |      |      |      |    |
| B  | 0.45  | -0.07 | -0.01 |       |       |       |       |       |       |       |       |       |       |       |       |       |       |       |       |       |       |       |       |       |       |       |       |      |      |      |    |
| Ba | 0.47  | 0.21  | 0.60  | 0.13  |       |       |       |       |       |       |       |       |       |       |       |       |       |       |       |       |       |       |       |       |       |       |       |      |      |      |    |
| Be | 0.47  | 0.51  | 0.35  | -0.04 | 0.20  |       |       |       |       |       |       |       |       |       |       |       |       |       |       |       |       |       |       |       |       |       |       |      |      |      |    |
| Bi | 0.50  | 0.30  | 0.44  | -0.03 | 0.39  | 0.72  |       |       |       |       |       |       |       |       |       |       |       |       |       |       |       |       |       |       |       |       |       |      |      |      |    |
| Ca | 0.14  | 0.12  | 0.11  | 0.10  | 0.08  | 0.34  | 0.28  |       |       |       |       |       |       |       |       |       |       |       |       |       |       |       |       |       |       |       |       |      |      |      |    |
| Cd | 0.23  | -0.12 | 0.63  | -0.15 | 0.40  | 0.34  | 0.68  | 0.25  |       |       |       |       |       |       |       |       |       |       |       |       |       |       |       |       |       |       |       |      |      |      |    |
| Co | 0.51  | 0.57  | 0.24  | 0.40  | 0.44  | 0.52  | 0.36  | 0.26  | -0.01 |       |       |       |       |       |       |       |       |       |       |       |       |       |       |       |       |       |       |      |      |      |    |
| Cr | 0.19  | 0.85  | -0.28 | 0.22  | 0.21  | 0.40  | 0.11  | 0.22  | -0.30 | 0.73  |       |       |       |       |       |       |       |       |       |       |       |       |       |       |       |       |       |      |      |      |    |
| Cs | 0.45  | 0.59  | 0.37  | -0.02 | 0.31  | 0.90  | 0.70  | 0.22  | 0.37  | 0.47  | 0.39  |       |       |       |       |       |       |       |       |       |       |       |       |       |       |       |       |      |      |      |    |
| Cu | 0.15  | 0.16  | 0.22  | -0.12 | 0.21  | 0.30  | 0.38  | 0.50  | 0.43  | 0.33  | 0.23  | 0.14  |       |       |       |       |       |       |       |       |       |       |       |       |       |       |       |      |      |      |    |
| Fe | 0.25  | 0.23  | 0.67  | -0.24 | 0.80  | 0.22  | 0.35  | -0.07 | 0.45  | 0.21  | 0.03  | 0.42  | 0.12  |       |       |       |       |       |       |       |       |       |       |       |       |       |       |      |      |      |    |
| Hg | 0.56  | 0.00  | 0.19  | 0.52  | 0.25  | 0.16  | -0.14 | 0.04  | -0.36 | 0.53  | 0.32  | 0.07  | -0.12 | -0.08 |       |       |       |       |       |       |       |       |       |       |       |       |       |      |      |      |    |
| K  | 0.11  | 0.96  | -0.25 | 0.09  | 0.21  | 0.43  | 0.21  | 0.18  | -0.18 | 0.64  | 0.92  | 0.50  | 0.17  | 0.16  | 0.08  |       |       |       |       |       |       |       |       |       |       |       |       |      |      |      |    |
| Li | 0.09  | 0.98  | -0.18 | -0.06 | 0.22  | 0.52  | 0.30  | 0.22  | -0.08 | 0.57  | 0.85  | 0.57  | 0.25  | 0.22  | -0.03 | 0.96  |       |       |       |       |       |       |       |       |       |       |       |      |      |      |    |
| Mg | 0.19  | 0.64  | -0.20 | 0.18  | 0.14  | 0.43  | 0.31  | 0.70  | -0.05 | 0.57  | 0.75  | 0.36  | 0.54  | -0.04 | 0.11  | 0.72  | 0.70  |       |       |       |       |       |       |       |       |       |       |      |      |      |    |
| Mn | 0.33  | -0.12 | 0.65  | -0.01 | 0.81  | -0.03 | 0.26  | -0.13 | 0.40  | 0.17  | -0.18 | 0.08  | 0.09  | 0.78  | 0.08  | -0.14 | -0.12 | -0.17 |       |       |       |       |       |       |       |       |       |      |      |      |    |
| Mo | 0.63  | 0.04  | 0.70  | 0.23  | 0.51  | 0.58  | 0.75  | 0.40  | 0.63  | 0.44  | 0.04  | 0.50  | 0.41  | 0.30  | 0.22  | 0.02  | 0.09  | 0.23  | 0.36  |       |       |       |       |       |       |       |       |      |      |      |    |
| Na | 0.24  | 0.23  | 0.04  | 0.71  | 0.39  | 0.10  | 0.19  | 0.36  | 0.09  | 0.50  | 0.40  | 0.10  | 0.07  | 0.02  | 0.26  | 0.37  | 0.29  | 0.41  | 0.14  | 0.34  |       |       |       |       |       |       |       |      |      |      |    |
| Ni | -0.05 | 0.73  | -0.27 | -0.22 | -0.02 | 0.38  | -0.01 | 0.27  | -0.38 | 0.50  | 0.79  | 0.27  | 0.33  | -0.04 | 0.21  | 0.74  | 0.76  | 0.66  | -0.27 | -0.07 | 0.00  |       |       |       |       |       |       |      |      |      |    |
| P  | 0.38  | -0.23 | 0.73  | -0.05 | 0.80  | -0.01 | 0.25  | 0.07  | 0.54  | 0.08  | -0.27 | 0.02  | 0.20  | 0.70  | 0.08  | -0.25 | -0.21 | -0.18 | 0.89  | 0.48  | 0.14  | -0.32 |       |       |       |       |       |      |      |      |    |
| Pb | 0.32  | -0.28 | 0.36  | 0.19  | 0.21  | 0.06  | 0.25  | 0.14  | 0.37  | 0.17  | -0.12 | -0.10 | 0.55  | 0.01  | 0.14  | -0.19 | -0.20 | 0.12  | 0.36  | 0.50  | 0.10  | -0.09 | 0.39  |       |       |       |       |      |      |      |    |
| S  | 0.22  | -0.51 | 0.55  | 0.03  | 0.18  | 0.07  | 0.32  | 0.44  | 0.61  | -0.08 | -0.47 | -0.07 | 0.37  | 0.02  | -0.04 | -0.54 | -0.44 | -0.13 | 0.20  | 0.65  | 0.10  | -0.41 | 0.49  | 0.43  |       |       |       |      |      |      |    |
| Sb | 0.42  | -0.17 | 0.52  | 0.03  | 0.37  | 0.28  | 0.56  | 0.21  | 0.60  | 0.20  | -0.15 | 0.12  | 0.47  | 0.13  | 0.07  | -0.22 | -0.13 | -0.02 | 0.27  | 0.75  | 0.09  | -0.15 | 0.41  | 0.54  | 0.70  |       |       |      |      |      |    |
| Se | 0.02  | 0.02  | 0.50  | -0.38 | 0.07  | 0.46  | 0.50  | 0.09  | 0.56  | -0.15 | -0.33 | 0.54  | 0.09  | 0.41  | -0.42 | -0.15 | 0.00  | -0.17 | 0.13  | 0.32  | -0.28 | -0.20 | 0.15  | -0.08 | 0.25  | 0.22  |       |      |      |      |    |
| Sr | 0.28  | 0.35  | 0.14  | 0.22  | 0.33  | 0.43  | 0.45  | 0.84  | 0.32  | 0.46  | 0.41  | 0.33  | 0.57  | 0.11  | 0.03  | 0.43  | 0.44  | 0.77  | 0.05  | 0.51  | 0.55  | 0.35  | 0.18  | 0.29  | 0.32  | 0.33  | 0.06  |      |      |      |    |
| V  | 0.18  | 0.94  | -0.08 | 0.11  | 0.34  | 0.47  | 0.25  | 0.22  | -0.09 | 0.73  | 0.92  | 0.54  | 0.24  | 0.28  | 0.15  | 0.95  | 0.94  | 0.70  | -0.04 | 0.14  | 0.42  | 0.71  | -0.13 | -0.19 | -0.41 | -0.10 | -0.10 | 0.45 |      |      |    |
| W  | 0.74  | -0.15 | 0.68  | 0.30  | 0.48  | 0.43  | 0.52  | 0.28  | 0.42  | 0.49  | 0.00  | 0.32  | 0.27  | 0.27  | 0.51  | -0.15 | -0.13 | 0.05  | 0.39  | 0.76  | 0.24  | -0.11 | 0.49  | 0.39  | 0.56  | 0.67  | 0.05  | 0.32 | 0.01 |      |    |
| Zn | 0.32  | 0.05  | 0.34  | 0.29  | 0.46  | 0.20  | 0.29  | 0.39  | 0.33  | 0.53  | 0.29  | 0.04  | 0.72  | 0.09  | 0.34  | 0.15  | 0.13  | 0.46  | 0.26  | 0.58  | 0.45  | 0.20  | 0.37  | 0.70  | 0.44  | 0.55  | -0.23 | 0.56 | 0.26 | 0.49 |    |
|    | Ag    | Al    | As    | B     | Ba    | Be    | Bi    | Ca    | Cd    | Co    | Cr    | Cs    | Cu    | Fe    | Hg    | K     | Li    | Mg    | Mn    | Mo    | Na    | Ni    | P     | Pb    | S     | Sb    | Se    | Sr   | V    | W    | Zn |

Table S3. Geochemical background values (Kabata-Pendias and Mukherjee, 2007)

| element | background value<br>[mg·kg <sup>-1</sup> ] |
|---------|--------------------------------------------|
| As      | 8.4                                        |
| B       | 40                                         |
| Ba      | 520                                        |
| Cd      | 0.45                                       |
| Co      | 10                                         |
| Cr      | 51                                         |
| Cu      | 23                                         |
| Hg      | 0.1                                        |
| Ni      | 26                                         |
| Pb      | 28                                         |
| Zn      | 60                                         |
